# Supplementary material
Source: publisher site journal article supplement (https://www.dovepress.com/article/403411)
Supplement: Supplementary file 1 [file get_supplementary_file.php]

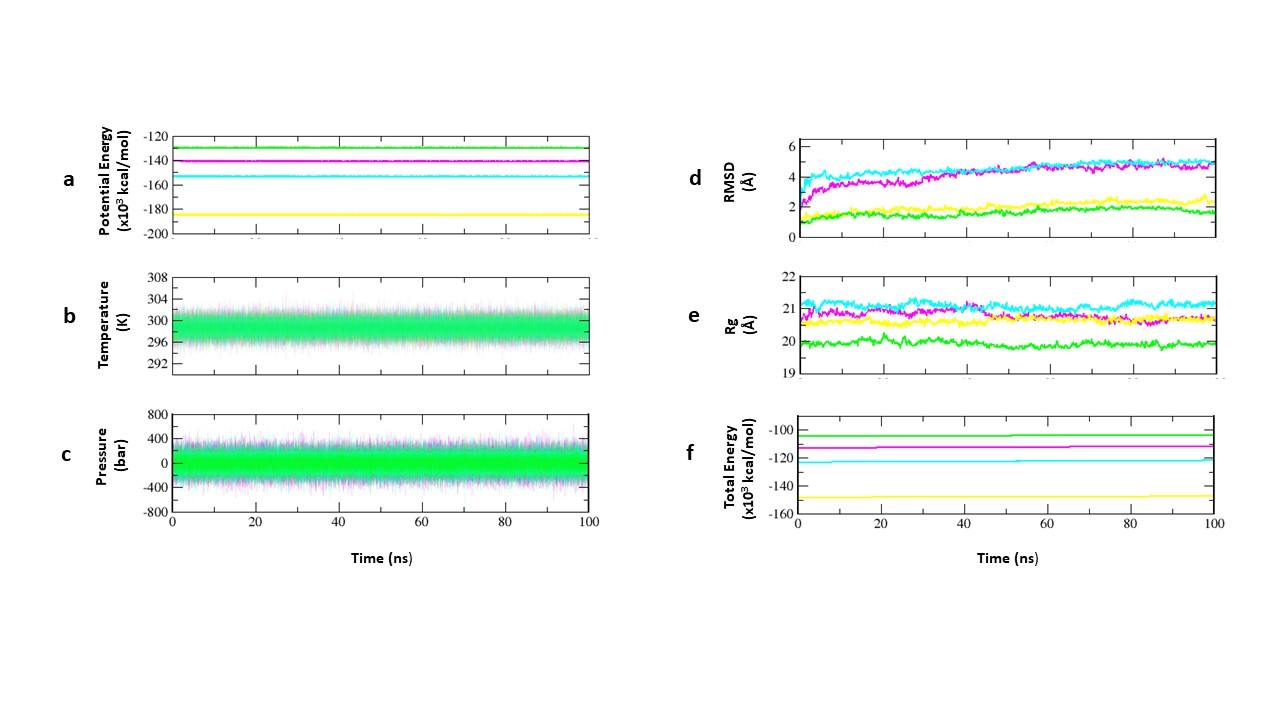


**Supplementary Figure 1 Graphs showing the dynamic parameters of the models during MD simulation.** (a) Potential energy; (b) Temperature; (c) Pressure; (d) RMSD; (e) Rg; (f) Total energy. Plots for *Leishmania donovani* PAF-AH, *Trypanosoma cruzi* PAF-AH, *Trypanosoma brucei* PAF-AH and human PAF-AH are shown in cyan, magenta, yellow and green, respectively.


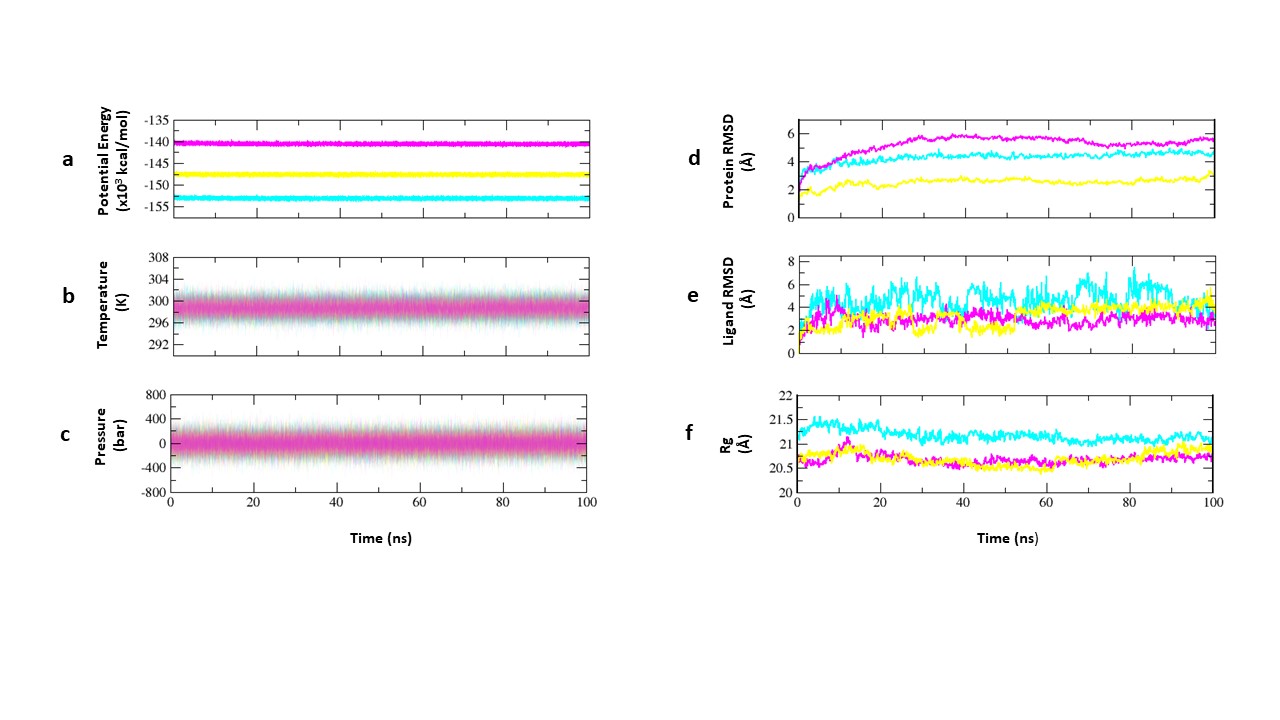


**Supplementary Figure 2** Graphs showing the dynamic parameters of parasitic PAF-AH complexes with their respective inhibitor molecules during MD simulation. (a) Potential energy; (b) Temperature; (c) Pressure; (d) Protein RMSD; (e) Ligand RMSD; (f) Rg. Plots for *Leishmania donovani* PAF-AH-D1, *Trypanosoma cruzi* PAF-AH-C1 and *Trypanosoma brucei* PAF-AH-B1 are shown in cyan, magenta and yellow, respectively.

| **Models** | **ERRAT** | **Verify 3D** | **Ramachandran Plot** | | |
| --- | --- | --- | --- | --- | --- |
| **Allowed Region** | **Generously allowed** | **Disallowed** |
| Swiss 1 Ld | 87.64 | 67.81 | 96.6 | 2.1 | 1.2 |
| **Swiss 2 Ld** | **79.66** | **72.37** | **97.9** | **1.2** | **0.9** |
| Swiss 3 Ld | 85.20 | 67.89 | 97.6 | 0.9 | 1.5 |
| Geno 3D 1 Ld | 74.10 | 60.21 | 91.1 | 4.9 | 4.1 |
| Geno 3D 2 Ld | 80.50 | 56.40 | 90.2 | 6.5 | 3.3 |
| Geno 3D 3 Ld | 86.54 | 54.67 | 89.5 | 8.1 | 2.4 |
| Geno 3D 4 Ld | 80.86 | 71.97 | 93.1 | 3.3 | 3.7 |
| Geno 3D 5 Ld | 80.57 | 61.59 | 91.1 | 6.1 | 2.8 |
| Swiss 1 Tc | 83.47 | 69.59 | 97.2 | 1.9 | 0.9 |
| **Swiss 2 Tc** | **77.81** | **64.38** | **99.1** | **0.6** | **0.3** |
| Swiss 3 Tc | 70.40 | 62.84 | 98.8 | 0.3 | 0.9 |
| Geno 3D 1 Tc | 81.08 | 58.02 | 93.0 | 4.6 | 2.3 |
| Geno 3D 2 Tc | 77.31 | 64.43 | 90.8 | 5.3 | 4.0 |
| Geno 3D 3 Tc | 81.79 | 54.81 | 91.4 | 5.6 | 3.0 |
| Geno 3D 4 Tc | 81.79 | 70.55 | 88.7 | 7.6 | 3.6 |
| Geno 3D 5 Tc | 82.68 | 58.89 | 91.1 | 6.6 | 2.3 |
| **Swiss 1 Tb** | **75.80** | **77.41** | **98.1** | **1.6** | **0.3** |
| Swiss 2 Tb | 79.09 | 68.04 | 96.9 | 1.9 | 1.3 |
| Swiss 3 Tb | 70.80 | 74.66 | 97.8 | 0.6 | 1.6 |
| Geno 3D 1 Tb | 74.66 | 40.91 | 90.3 | 5.2 | 4.5 |
| Geno 3D 2 Tb | 82.75 | 48.70 | 89.5 | 4.5 | 6.0 |
| Geno 3D 3 Tb | 71.23 | 17.53 | 85.8 | 9.0 | 5.2 |
| Geno 3D 4 Tb | 84.93 | 42.86 | 88.0 | 6.7 | 5.2 |
| Geo 3D 5 Tb | 89.04 | 49.35 | 89.6 | 7.5 | 3.0 |

**Supplementary Table. 1** Validation parameters for the PAFAH models of *Leishmania donovani*, *Trypanosoma cruzi, and Trypanosoma brucei*
